# Supplementary material for: Environmental Contamination Prevalence, Antimicrobial Resistance and Molecular Characteristics of Methicillin-Resistant Staphylococcus Aureus and Staphylococcus Epidermidis Isolated from Secondary Schools in Guangzhou, China
Source: PubMed Central journal article supplement (PMC7013935; doi:10.3390/ijerph17020623), 2020-01-18
Supplement: ijerph-17-00623-s001.pdf [file ijerph-17-00623-s001.pdf]

**Supplementary Table S1.** Nucleotide sequences of primers and size of PCR products (bp) of genes.

| Gene               | Primer      | Oligonucleotides sequence (5'-3') | PCR product (bp) |
|--------------------|-------------|-----------------------------------|------------------|
| <i>16SrRNA</i>     | 16SrRNA-1   | AACTCTGTTATTAGGGAAGAACA           | 756              |
|                    | 16SrRNA-2   | CCACCTTCCTCCGTTTGTACC             |                  |
| <i>nuc</i>         | nuc-1       | GCGATTGATGGTGATACGGTT             | 279              |
|                    | muc-2       | AGCCAAGCCTTGACGAACTAAAGC          |                  |
| <i>epi</i>         | epi-1       | TTGTAAACCATTCTGGACCG              | 251              |
|                    | epi-2       | ATGCGTGAGATACTTCTTCG              |                  |
| <i>mecA</i>        | mecA-1      | AAAATCGATGGTAAAGGTTGGC            | 533              |
|                    | mecA-2      | AGTTCTGCAGTACCGGATTGC             |                  |
| PVL                | pvl-1       | ATCATTAGGTAAAATGTCTGGACATGATCCA   | 433              |
|                    | pvl-2       | GCATCAAGTGTATTGGATAGCAAAAGC       |                  |
| <i>tst</i>         | tst-1       | ACCCCTGTTCCCTTATCATC              | 326              |
|                    | tst-2       | TTTTCAGTATTTGTAACGCC              |                  |
| <i>sea</i>         | sea-1       | GGTTATCAATGTGCGGGTGG              | 102              |
|                    | sea-2       | CGGCACTTTTTTCTCTTCGG              |                  |
| <i>seb</i>         | seb-1       | GTATGGTGGTGTAAGTACTGAGC           | 164              |
|                    | seb-2       | CCAAATAGTGACGAGTTAGG              |                  |
| <i>hla</i>         | hla-1       | CTGATTACTATCCAAGAAATTCGATTG       | 209              |
|                    | hla-2       | CTTCCAGCCTACTTTTTTATCAGT          |                  |
| SCC <i>mec</i> I   | Type I-1    | GCTTAAAGAGTGTCTGTTACAGG           | 613              |
|                    | Type I-2    | GTTCTCTCATAGTATGACGTCC            |                  |
| SCC <i>mec</i> II  | Type II-1   | CGTTGAAGATGATGAAGCG               | 398              |
|                    | Type II-2   | CGAAATCAATGGTTAATGGACC            |                  |
| SCC <i>mec</i> III | Type III-1  | CCATATTGTGTACGATGCG               | 280              |
|                    | Type III-2  | CCTTAGTTGTCGTAACAGATCG            |                  |
| SCC <i>mec</i> IVa | Type IVa -1 | GCCTTATTCGAAGAAACCG               | 776              |
|                    | Type IVa -2 | CTACTCTTCTGAAAAGCGTCG             |                  |
| SCC <i>mec</i> IVb | Type IVc -1 | TCTGGAATTACTTCAGCTGC              | 493              |
|                    | Type IVc -2 | AAACAATATTGCTCTCCCTC              |                  |
| SCC <i>mec</i> IVc | Type IVc -1 | CCTGAATCTAAAGAGATACACCG           | 200              |
|                    | Type IVc -2 | GGTTATTTTCATAGTGAATCGC            |                  |
| SCC <i>mec</i> IVd | Type IVd -1 | CTCAAATACGGACCCCAATACA            | 881              |
|                    | Type IVd -2 | TGCTCCAGTAATTGCTAAAG              |                  |
| SCC <i>mec</i> V   | Type V-1    | GAACATTGTTACTTAAATGAGCG           | 325              |
|                    | Type V-2    | TGAAAGTTGTACCCTTGACACC            |                  |
